# Supplementary material for: Toothpastes with Enzymes Support Gum Health and Reduce Plaque Formation
Source: MDPI journal article supplement (doi:10.3390/ijerph18020835), 2021-01-19
Supplement: s1 [file s1]

## Supplement Table S1

The base formulation of the enzyme-containing toothpastes served as placebo reference toothpaste in the laboratory testing (000) and in the clinical testing. The composition was based on the commercially available Enzycal 950 toothpaste (CURADEN, Kriens, Switzerland).

| Ingredients                     | % W/W  |
|---------------------------------|--------|
| Water                           | 26.734 |
| Sorbitol solution 70 % PhEur    | 28.5   |
| Glycerin 1.23                   | 15     |
| Sident 8                        | 12     |
| Sident 22 S                     | 8.077  |
| Mulsifan CSA 20 (water soluble) | 4      |
| Veegum D                        | 2      |
| Hombitan AFDC 170 nm            | 1      |
| Pepso 444348 (Luzi)             | 0.7    |
| Sodium phosphate dibasic        | 0.5    |
| Genuvisco TPC 1 (Carrageenan)   | 0.5    |
| Sodium chloride                 | 0.33   |
| Sodium fluoride                 | 0.229  |
| Citric acid                     | 0.2    |
| Sodium benzoate                 | 0.15   |
| Sodium saccharin 450-fold       | 0.08   |
