# Supplementary material for: Toothpastes with Enzymes Support Gum Health and Reduce Plaque Formation
Source: Int J Environ Res Public Health. 2021 Jan 19;18(2):835. doi: 10.3390/ijerph18020835 (PMC7835853; doi:10.3390/ijerph18020835)
Supplement: Supplementary file 1 [file ijerph-18-00835-s001.zip]

Archive with 4 entries (4 files):
- Supplemental Table S3.xlsx
- Supplemented Data S1.tiff
- Supplemented Table S1.pdf
- Supplemented Table S2.pdf
