# Supplementary material for: Toothpastes with Enzymes Support Gum Health and Reduce Plaque Formation
Source: Int J Environ Res Public Health. 2021 Jan 19;18(2):835. doi: 10.3390/ijerph18020835 (PMC7835853; doi:10.3390/ijerph18020835)
Supplement: Supplementary file 1 [file ijerph-18-00835-s001.zip › Supplemental Table S3.xlsx]

## Sheet: all
Code	ZP	PI [%]	Phase	periode	BOP [%]	diff bop(2-1)
SS_02		84.6	1	1	1.9
SS_02		98.14	1	2	35.18	33.28
SS_02		62.96	1	3	6.17
SS_02		95.83	1	4	7.41	1.24
XK_03		86.9	1	1	8.33
XK_03		92.86	1	2	13.69	5.36
XK_03		87.5	1	3	15.47
XK_03		91.66	1	4	22.61	7.14
XK_03	D	51.78	2	1	7.73
XK_03	D	73.21	2	2	4.16	-3.57
XK_03	A	61.3	2	3	11.9
XK_03	A	80.95	2	4	10.71	-1.19
XK_03	C	70.83	2	5	11.3
XK_03	C	79.16	2	6	17.26	5.96
XK_03	B	58.92	2	7	12.5
XK_03	B	69.64	2	8	14.88	2.38
SH_04		72.6	1	1	13.7
SH_04		87.5	1	2	42.85	29.15
SH_04		74.4	1	3	17.86
SH_04		97.62	1	4	20.24	2.38
SH_04	D	76.78	2	1	18.45
SH_04	D	82.73	2	2	16.66	-1.79
SH_04	A	58.92	2	3	14.28
SH_04	A	78.57	2	4	18.45	4.17
SH_04	C	75	2	5	14.28
SH_04	C	76.78	2	6	13.09	-1.19
SH_04	B	69.64	2	7	19.64
SH_04	B	64.88	2	8	19.64	0
JB_05		64.9	1	1	6
JB_05		92.26	1	2	30.35	24.35
JB_05		86.9	1	3	5.36
JB_05		96.43	1	4	14.88	9.52
JB_05	C	74.4	2	1	10.71
JB_05	C	86.3	2	2	10.71	0
JB_05	D	69.64	2	3	4.76
JB_05	D	86.3	2	4	7.73	2.97
JB_05	B	77.38	2	5	7.73
JB_05	B	77.97	2	6	5.35	-2.38
JB_05	A	82.73	2	7	11.9
JB_05	A	86.3	2	8	7.14	-4.76
FH_06		72.62	1	1	7.74
FH_06		98.21	1	2	24.4	16.66
FH_06		64.9	1	3	11.31
FH_06		94.04	1	4	21.42	10.11
FH_06	A	54.16	2	1	4.76
FH_06	A	78.57	2	2	5.35	0.59
FH_06	B	35.71	2	3	3.57
FH_06	B	81.54	2	4	7.73	4.16
FH_06	D	77.38	2	5	5.95
FH_06	D	76.78	2	6	8.92	2.97
FH_06	C	54.16	2	7	8.33
FH_06	C	86.3	2	8	4.16	-4.17
MF_07		77.97	1	1	3.9
MF_07		94.04	1	2	29.16	25.26
MF_07		86.9	1	3	3.57
MF_07		97.02	1	4	10.71	7.14
MF_07	B	80.35	2	1	5.95
MF_07	B	85.11	2	2	5.35	-0.6
MF_07	C	84.52	2	3	2.97
MF_07	C	84.52	2	4	2.38	-0.59
MF_07	A	82.73	2	5	5.35
MF_07	A	77.97	2	6	5.95	0.6
MF_07	D	83.33	2	7	2.38
MF_07	D	62.5	2	8	3.57	1.19
MA_08		85.11	1	1	13.09
MA_08		97.61	1	2	40.47	27.38
MA_08		87.5	1	3	19.1
MA_08		98.21	1	4	29.17	10.07
DA_12		75.5	1	1	5.6
DA_12		93.45	1	2	14.88	9.28
DA_12		49.4	1	3	7.74
DA_12		92.86	1	4	18.45	10.71
DA_12	B	52.97	2	1	6.54
DA_12	B	84.52	2	2	11.9	5.36
DA_12	C	64.28	2	3	6.54
DA_12	C	72.61	2	4	5.95	-0.59
DA_12	A	54.76	2	5	4.76
DA_12	A	67.26	2	6	7.14	2.38
DA_12	D	32.73	2	7	13.09
DA_12	D	63.09	2	8	9.52	-3.57
DK_13		47.6	1	1	1.2
DK_13		90.4	1	2	16.6	15.4
DK_13		63.69	1	3	2.38
DK_13		94.05	1	4	23.81	21.43
AH_15		61.4	1	1	4.6
AH_15		97.02	1	2	23.08	18.48
AH_15		73.21	1	3	7.74
AH_15		98.21	1	4	7.14	-0.6
NH_16		91.66	1	1	15.48
NH_16		88.1	1	2	20.83	5.35
NH_16		89.34	1	3	22.02
NH_16		97.02	1	4	19.64	-2.38
NH_16	C	82.14	2	1	13.09
NH_16	C	80.95	2	2	21.42	8.33
NH_16	D	87.5	2	3	16.66
NH_16	D	88.69	2	4	8.92	-7.74
NH_16	B	78.57	2	5	13.69
NH_16	B	84.52	2	6	10.11	-3.58
NH_16	B	77.38	2	7	26.47
NH_16	A	86.3	2	8	19.64	-6.83
TS_17		87.68	1	1	6.52
TS_17		94.2	1	2	7.97	1.45
TS_17		78.26	1	3	5.64
TS_17		92.02	1	4	8.69	3.05
AMB_18		77.98	1	1	8.33
AMB_18		89.29	1	2	10.71	2.38
AMB_18		57.2	1	3	8.93
AMB_18		96.42	1	4	19.04	10.11
AMB_18	A	57.73	2	1	11.9
AMB_18	A	79.76	2	2	1.78	-10.12
AMB_18	B	51.78	2	3	8.33
AMB_18	B	83.33	2	4	12.5	4.17
AMB_18	D	57.73	2	5	7.73
AMB_18	D	72.02	2	6	7.14	-0.59
AMB_18	C	48.8	2	7	4.76
AMB_18	C	78.57	2	8	9.52	4.76
SK_19		70.83	1	1	16.66
SK_19		92.36	1	2	31.25	14.59
SK_19		50	1	3	21.53
SK_19		97.91	1	4	30.55	9.02
SK_19	C	37.82	2	1	8.33
SK_19	C	88.46	2	2	12.82	4.49
SK_19	D	52.77	2	3	8.33
SK_19	D	89.58	2	4	13.88	5.55
SK_19	B	55.55	2	5	20.13
SK_19	B	79.86	2	6	18.05	-2.08
SK_19	A	50	2	7	16.66
SK_19	A	69.64	2	8	5.55	-11.11
TZ_20		72.62	1	1	11.9
TZ_20		91.67	1	2	16.07	4.17
TZ_20		82.73	1	3	11.9
TZ_20		94.64	1	4	23.21	11.31
TZ_20	A	75	2	1	7.14
TZ_20	A	76.78	2	2	9.52	2.38
TZ_20	B	65.47	2	3	4.16
TZ_20	B	77.38	2	4	7.14	2.98
TZ_20	D	75	2	5.3	16.07
TZ_20	D	66.66	2	6	8.33	-7.74
TZ_20	C	70.23	2	7	7.14
TZ_20	C	72.02	2	8	5.35	-1.79
RB_21		62.5	1	1	6.5
RB_21		89.88	1	2	22.02	15.52
RB_21		48.21	1	3	11.9
RB_21		86.9	1	4	13.69	1.79
RB_21	C	49.4	2	1	13.69
RB_21	C	72.02	2	2	5.95	-7.74
RB_21	D	51.78	2	3	21.42
RB_21	D	73.8	2	4	13.69	-7.73
RB_21	B	53.57	2	5	15.47
RB_21	B	75	2	6	6.54	-8.93
RB_21	A	50	2	7	11.3
RB_21	A	76.78	2	8	10.11	-1.19
SI_22		80.95	1	1	7.14
SI_22		94.64	1	2	13.69	6.55
SI_22		83.92	1	3	14.88
SI_22		89.28	1	4	17.26	2.38
SI_22	B	46.74	2	1.2	5.35
SI_22	B	43.45	2	2	7.14	1.79
SI_22	D	58.92	2	3	11.3
SI_22	D	69.64	2	4	5.95	-5.35
SI_22	C	64.28	2	7	6.54
SI_22	C	81.54	2	8	5.95	-0.59
PP_23		60.12	1	1	4.17
PP_23		94.64	1	2	3.57	-0.6
PP_23		39.9	1	3	4.17
PP_23		85.71	1	4	3.57	-0.6
MC_24		75.6	1	1	6.55
MC_24		88.69	1	2	20.24	13.69
MC_24		62.5	1	3	8.33
MC_24		91.66	1	4	22.02	13.69
MC_24	D	47.61	2	1	9.52
MC_24	D	79.76	2	2	12.5	2.98
MC_24	A	58.33	2	3	10.71
MC_24	A	76.78	2	4	7.14	-3.57
MC_24	C	45.83	2	5	6.54
MC_24	C	8.33	2	6	5.95	-0.59
MC_24	B	33.92	2	7	5.35
MC_24	B	58.33	2	8	7.73	2.38
SZ-25		83.93	1	1	6.55
SZ-25		94.64	1	2	11.31	4.76
SZ-25		69.64	1	3	8.93
SZ-25		92.85	1	4	14.88	5.95
SZ_25	B	58.33	2	1	4.76
SZ_25	B	79.76	2	2	13.09	8.33
SZ_25	C	32.14	2	3	3.57
SZ_25	C	85.11	2	4	2.38	-1.19
SZ_25	A	42.85	2	5	6.54
SZ_25	A	88.69	2	6	8.33	1.79
SZ_25	D	59.52	2	7	12.5
SZ_25	D	63.69	2	8	5.35	-7.15
UK_26		68.45	1	1	5.95
UK_26		94.05	1	2	20.83	14.88
UK_26		57.73	1	3	7.73
UK_26		84.52	1	4	14.28	6.55
UK_26	B	66.07	2	1	4.16
UK_26	B	70.23	2	2	3.57	-0.59
UK_26	C	59.52	2	3	4.16
UK_26	C	78.57	2	4	5.95	1.79
UK_26	A	59.52	2	5	10.11
UK_26	A	72.61	2	6	5.95	-4.16
UK_26	D	59.52	2	7	5.95
UK_26	D	71.42	2	8	2.97	-2.98
LR_27		64.74	1	1	5.12
LR_27		66.66	1	2	4.76	-0.36
LR_27		55.12	1	3	0.64
LR_27		59.61	1	4	5.76	5.12
KA_28		59.52	1	1	27.97
KA_28		79.28	1	2	13.09	-14.88
KA_28		49.4	1	3	17.85
KA_28		77.97	1	4	3.57	-14.28
WS_29		85.42	1	1	10.42
WS_29		95.83	1	2	20.13	9.71
WS_29		80.35	1	3	5.95
WS_29		92.85	1	4	10.71	4.76
WS_29	D	68.05	2	1	8.33
WS_29	D	95.13	2	2	6.25	-2.08
WS_29	A	65.27	2	3	3.47
WS_29	A	95	2	4	4.16	0.69
WS_29	C	56.25	2	5	6.94
WS_29	C	94.44	2	6	2.77	-4.17
WS_29	B	53.47	2	7	5.55
WS_29	B	86.11	2	8	6.25	0.7
AK_30		92.26	1	1	26.19
AK_30		97.02	1	2	32.73	6.54
AK_30		83.33	1	3	17.26
AK_30		90.47	1	4	18.45	1.19
AB_31		82.73	1	1	7.73
AB_31		80.35	1	2	17.26	9.53
AB_31		76.78	1	3	10.71
AB_31		79.16	1	4	12.5	1.79
AB_31	A	80.95	2	1	2.38
AB_31	A	87.5	2	2	7.14	4.76
AB_31	B	33.92	2	3	7.14
AB_31	B	44.04	2	4	8.33	1.19
AB_31	D	72.02	2	5	4.76
AB_31	D	83.92	2	6	5.35	0.59
AB_31	C	73.11	2	7	5.35
AB_31	C	97.61	2	8	5.35	0
SH_32		70.83	1	1	20.83
SH_32		76.19	1	2	17.26	-3.57
SH_32		66.07	1	3	17.85
SH_32		72.02	1	4	12.5	-5.35
MS_33		63.09	1	1	9.52
MS_33		66.66	1	2	9.52	0
MS_33		36.3	1	3	13.09
MS_33		72.02	1	4	4.76	-8.33
HM_34		75	1	1	19.04
HM_34		67.85	1	2	6.54	-12.5
HM_34		68.45	1	3	17.85
HM_34		89.88	1	4	7.14	-10.71
SH_35		73.8	1	1	11.3
SH_35		79.76	1	2	13.69	2.39
SH_35		40.47	1	3	8.92
SH_35		77.97	1	4	18.45	9.53
SH_35	C	61.9	2	1	7.14
SH_35	C	73.21	2	2	8.92	1.78
SH_35	D	57.73	2	3	12.5
SH_35	D	77.97	2	4	7.14	-5.36
SH_35	B	51.19	2	5	7.73
SH_35	B	58.92	2	6	11.9	4.17
SH_35	A	59.52	2	7	7.14
SH_35	A	82.14	2	8	7.14	0
MR_36		60.71	1	1	19.64
MR_36		87.5	1	2	13.09	-6.55
MR_36		45.83	1	3	14.28
MR_36		89.88	1	4	5.95	-8.33
YS_38		65.47	1	1	41.07
YS_38		84.52	1	2	30.35	-10.72
YS_38		58.33	1	3	7.14
YS_38		87.5	1	4	11.9	4.76
TP_39		69.04	1	1	23.21
TP_39		89.88	1	2	25	1.79
TP_39		66.07	1	3	16.66
TP_39		85.11	1	4	17.26	0.6
TP_39	B	56.54	2	1	9.52
TP_39	B	79.16	2	2	9.52	0
TP_39	C	60.71	2	3	14.88
TP_39	C	91.07	2	4	16.07	1.19
TP_39	A	59.52	2	5	13.69
TP_39	A	91.07	2	6	16.07	2.38
TP_39	D	64.28	2	7	12.5
TP_39	D	82.73	2	8	22.61	10.11
DB_40		46.52	1	1	15
DB_40		59.72	1	2	25	10
DB_40		43.05	1	3	9.02
DB_40		76.38	1	4	13.19	4.17
DB_40	D	48.61	2	1	14.58
DB_40	D	41.6	2	2	6.94	-7.64
DB_40	A	41.66	2	3	11.11
DB_40	A	75.69	2	4	8.33	-2.78
DB_40	C	48.61	2	5	2.77
DB_40	C	62.5	2	6	13.88	11.11
DB_40	B	50	2	7	8.33
DB_40	B	57.63	2	8	18.05	9.72
AH_41		75.59	1	1	12.5
AH_41		88.69	1	2	12.5	0
AH_41		66.07	1	3	8.92
AH_41		82.14	1	4	7.14	-1.78
AM_42		60.11	1	1	20.23
AM_42		91.07	1	2	10.11	-10.12
AM_42		57.14	1	3	5.35
AM_42		94.04	1	4	3.57	-1.78
AL_43		63.69	1	1	12.5
AL_43		94.64	1	2	10.11	-2.39
AL_43		52.97	1	3	8.92
AL_43		85.11	1	4	3.57	-5.35

## Sheet: INFO
TP	Data of the Test-Phase (thoothpastes A, B, C, D), high responder
all A-F	TP inklusive E+F water rinsing of the pre-phase (only high responder)
Column
Code	Sample ID of subjects
ZP	Toothpastes A, B, C, D und water rinsing E, F
Phase	1 = prephase, water
	2 = Test phase, toothpaste rinsing
Periode	permuted order of the toothpaste rinsing (1-8, even numbers correspond to Fridays (day 4))
	or order of the pre-phase (1-4, even numbers correspond to Fridays (day 4))
diff bop	difference of baseline values to post-rinse values (2-1)
A	C+
B	SLS
C	Reference
D	C-
E	Water rinsing
F	Water rinsing

## Sheet: all A-F
Code	ZP	PI [%]	Phase	periode	diff bop
XK_03	E	92.86	1	2	5.36
XK_03	F	91.66	1	4	7.14
XK_03	D	73.21	2	2	-3.57
XK_03	A	80.95	2	4	-1.19
XK_03	C	79.16	2	6	5.96
XK_03	B	69.64	2	8	2.38
SH_04	E	87.5	1	2	29.15
SH_04	F	97.62	1	4	2.38
SH_04	D	82.73	2	2	-1.79
SH_04	A	78.57	2	4	4.17
SH_04	C	76.78	2	6	-1.19
SH_04	B	64.88	2	8	0
JB_05	E	92.26	1	2	24.35
JB_05	F	96.43	1	4	9.52
JB_05	C	86.3	2	2	0
JB_05	D	86.3	2	4	2.97
JB_05	B	77.97	2	6	-2.38
JB_05	A	86.3	2	8	-4.76
FH_06	E	98.21	1	2	16.66
FH_06	F	94.04	1	4	10.11
FH_06	A	78.57	2	2	0.59
FH_06	B	81.54	2	4	4.16
FH_06	D	76.78	2	6	2.97
FH_06	C	86.3	2	8	-4.17
MF_07	E	94.04	1	2	25.26
MF_07	F	97.02	1	4	7.14
MF_07	B	85.11	2	2	-0.6
MF_07	C	84.52	2	4	-0.59
MF_07	A	77.97	2	6	0.6
MF_07	D	62.5	2	8	1.19
DA_12	E	93.45	1	2	9.28
DA_12	F	92.86	1	4	10.71
DA_12	B	84.52	2	2	5.36
DA_12	C	72.61	2	4	-0.59
DA_12	A	67.26	2	6	2.38
DA_12	D	63.09	2	8	-3.57
NH_16	E	88.1	1	2	5.35
NH_16	F	97.02	1	4	-2.38
NH_16	C	80.95	2	2	8.33
NH_16	D	88.69	2	4	-7.74
NH_16	B	84.52	2	6	-3.58
NH_16	A	86.3	2	8	-6.83
AMB_18	E	89.29	1	2	2.38
AMB_18	F	96.42	1	4	10.11
AMB_18	A	79.76	2	2	-10.12
AMB_18	B	83.33	2	4	4.17
AMB_18	D	72.02	2	6	-0.59
AMB_18	C	78.57	2	8	4.76
SK_19	E	92.36	1	2	14.59
SK_19	F	97.91	1	4	9.02
SK_19	C	88.46	2	2	4.49
SK_19	D	89.58	2	4	5.55
SK_19	B	79.86	2	6	-2.08
SK_19	A	69.64	2	8	-11.11
TZ_20	E	91.67	1	2	4.17
TZ_20	F	94.64	1	4	11.31
TZ_20	A	76.78	2	2	2.38
TZ_20	B	77.38	2	4	2.98
TZ_20	D	66.66	2	6	-7.74
TZ_20	C	72.02	2	8	-1.79
RB_21	E	89.88	1	2	15.52
RB_21	F	86.9	1	4	1.79
RB_21	C	72.02	2	2	-7.74
RB_21	D	73.8	2	4	-7.73
RB_21	B	75	2	6	-8.93
RB_21	A	76.78	2	8	-1.19
SI_22	E	94.64	1	2	6.55
SI_22	F	89.28	1	4	2.38
SI_22	B	43.45	2	2	1.79
SI_22	D	69.64	2	4	-5.35
SI_22	C	81.54	2	8	-0.59
MC_24	E	88.69	1	2	13.69
MC_24	F	91.66	1	4	13.69
MC_24	D	79.76	2	2	2.98
MC_24	A	76.78	2	4	-3.57
MC_24	C	8.33	2	6	-0.59
MC_24	B	58.33	2	8	2.38
SZ-25	E	94.64	1	2	4.76
SZ-25	F	92.85	1	4	5.95
SZ_25	B	79.76	2	2	8.33
SZ_25	C	85.11	2	4	-1.19
SZ_25	A	88.69	2	6	1.79
SZ_25	D	63.69	2	8	-7.15
UK_26	E	94.05	1	2	14.88
UK_26	F	84.52	1	4	6.55
UK_26	B	70.23	2	2	-0.59
UK_26	C	78.57	2	4	1.79
UK_26	A	72.61	2	6	-4.16
UK_26	D	71.42	2	8	-2.98
WS_29	E	95.83	1	2	9.71
WS_29	F	92.85	1	4	4.76
WS_29	D	95.13	2	2	-2.08
WS_29	A	95	2	4	0.69
WS_29	C	94.44	2	6	-4.17
WS_29	B	86.11	2	8	0.7
AB_31	E	80.35	1	2	9.53
AB_31	F	79.16	1	4	1.79
AB_31	A	87.5	2	2	4.76
AB_31	B	44.04	2	4	1.19
AB_31	D	83.92	2	6	0.59
AB_31	C	97.61	2	8	0
SH_35	E	79.76	1	2	2.39
SH_35	F	77.97	1	4	9.53
SH_35	C	73.21	2	2	1.78
SH_35	D	77.97	2	4	-5.36
SH_35	B	58.92	2	6	4.17
SH_35	A	82.14	2	8	0
TP_39	E	89.88	1	2	1.79
TP_39	F	85.11	1	4	0.6
TP_39	B	79.16	2	2	0
TP_39	C	91.07	2	4	1.19
TP_39	A	91.07	2	6	2.38
TP_39	D	82.73	2	8	10.11
DB_40	E	59.72	1	2	10
DB_40	F	76.38	1	4	4.17
DB_40	D	41.6	2	2	-7.64
DB_40	A	75.69	2	4	-2.78
DB_40	C	62.5	2	6	11.11
DB_40	B	57.63	2	8	9.72
